1 **Title:** **Spiking network optimized for noise robust word recognition**  
2 **approaches human-level performance and predicts auditory**  
3 **system hierarchy**  
4

5 **Authors:** Fatemeh Khatami<sup>1</sup> and Monty A. Escabí<sup>1,2,3</sup>  
6

7 **Affiliation:** Department of Biomedical Engineering<sup>1</sup>, Department of Electrical and  
8 Computer Engineering<sup>2</sup>, and Department of Psychological Sciences<sup>3</sup>,  
9 University of Connecticut, Storrs, CT 06109  
10

11 **Correspondence:** Monty A. Escabí  
12 Department of Electrical and Computer Engineering  
13 371 Fairfield Way, U4157  
14 Storrs, CT 06269  
15 [escabi@engr.uconn.edu](mailto:escabi@engr.uconn.edu)  
16

17 **Manuscript Info:** 7 figures, 165 (abstract), 235 (introduction), 738 (discussion)  
18

19 **Conflict of Interest:** None  
20

21 **Author Contribution:** M.A.E. developed the auditory HSSN model. F.K. optimized and refined  
22 the model and analyzed the data. M.A.E. and F.K. contributed to manuscript preparation.  
23

24 **Acknowledgments:** We thank Heather Read and Ian Stevenson for providing feedback on the  
25 manuscript and E.D. Young for providing auditory nerve data. Research reported in this  
26 publication was partly supported by the National Institute On Deafness And Other Communication  
27 Disorders of the National Institutes of Health under Award Number R01DC015138 and a grant  
28 from the University of Connecticut Research Foundation. The content is solely the responsibility  
29 of the authors and does not necessarily represent the official views of the National Institutes of  
30 Health.  
31

32 **Significance Statement:** The brain's ability to recognize sounds in the presence of competing  
33 sounds or background noise is essential for everyday hearing tasks. How the brain accomplishes  
34 noise resiliency, however, is poorly understood. Using neural recording from the ascending  
35 auditory pathway and an auditory spiking network model trained for optimal sound recognition in  
36 noise we explore the computational strategies that enable noise robustness. Our results suggest that  
37 the hierarchical organization of the auditory pathway and the resulting nonlinear transformations  
38 may form a near optimal strategy that is essential for sound recognition in the presence of noise.  
39

40 **Keywords:** auditory system, hearing, speech recognition, background noise, spectro-temporal,  
41 spiking network, population code  
42

## 43 **Abstract**

44           The auditory neural code is resilient to acoustic variability and capable of recognizing  
45 sounds amongst competing sound sources, yet, the transformations enabling noise robust abilities  
46 are largely unknown. We report that a hierarchical spiking neural network (HSNN) trained to  
47 maximize word recognition accuracy in noise and multiple talkers approaches human-level  
48 performance. Intriguingly, comparisons with data from auditory nerve, midbrain, thalamus and  
49 cortex reveals that the organization and nonlinear transformations of the optimal network predict  
50 several properties of the ascending auditory pathway including a sequential loss of temporal  
51 resolution, increasing sparseness and selectivity. The optimal organizational scheme is critical for  
52 noise robustness since an identical network arranged to enable high information transfer does not  
53 predict auditory pathway organization and has substantially poorer performance. Furthermore,  
54 conventional linear and nonlinear receptive field-based models fail to achieve similar noise robust  
55 performance. The findings suggest that the auditory pathway hierarchy and its sequential nonlinear  
56 feature extraction computations may form a near optimal code capable of efficiently detecting  
57 sounds in noise impoverished conditions.

## 58 **Introduction**

59           Being able to identify sounds in the presence of background noise is essential for every-  
60 day audition and vital for survival. Although several cortical mechanisms have been proposed to  
61 facilitate robust coding of sounds<sup>1,2</sup> it is presently unclear how the sequential organization of the  
62 ascending auditory pathway and the resulting nonlinear transformations contribute to robust sound  
63 recognition.

64           Several hierarchical changes in spectral and temporal selectivity are consistently observed  
65 in the ascending auditory pathway of mammals. Temporal selectivity and resolution change

66 dramatically over more than an order of magnitude, from a high-resolution representation in the  
67 cochlea, where auditory nerve fibers synchronize to temporal features of up to ~1000 Hz, to  
68 progressively slower (limited to ~25 Hz) and coarser resolution representation as observed in  
69 auditory cortex<sup>3</sup>. Furthermore, although changes in spectral selectivity can be described across  
70 different stages of the auditory pathway, and spectral resolution is somewhat coarser in central  
71 levels, changes in frequency resolution are somewhat more homogeneous and less dramatic<sup>4-6</sup>. It  
72 is plausible that such hierarchical transforms across auditory nuclei are essential for feature  
73 extraction and ultimately high-level auditory tasks such as acoustic object recognition. Yet, it is  
74 unclear whether these sequential transformations comprise an optimal computational strategy for  
75 noise robust sound encoding. Here we report that the hierarchical organization of the auditory  
76 pathway and its sequential nonlinear feature extraction transformations form a near-optimal  
77 computation strategy for noise robust sound coding.

78

## 79 RESULTS

### 80 **Task optimized hierarchical spiking neural network predicts auditory system organization**

81 We developed a physiologically motivated hierarchical spiking neural network (HSNN)  
82 and trained it on a behaviorally relevant word recognition task in the presence of background noise  
83 and multiple talkers. Like the auditory pathway, the HSNN receives frequency-organized input  
84 from a cochlear stage (Fig. 1a) and maintains its topographic (tonotopic) organization through a  
85 network of frequency organized integrate-and-fire spiking neurons (Fig. 1b). For each sound, such  
86 as the word “zero”, the network produces a dynamic spatio-temporal pattern of spiking activity  
87 (Fig. 1b, right) as observed for peripheral and central auditory structures<sup>7-9</sup>. Each neuron is highly  
88 interconnected containing frequency specific and co-tuned excitatory and inhibitory connections

89 <sup>10-13</sup> that project across six network layers (Fig. 1b). Converging spikes from neurons in a given  
90 layer (Fig 1d) are weighted by frequency localized excitatory and inhibitory connectivity functions  
91 and the resulting excitatory and inhibitory post-synaptic potentials are integrated by the recipient  
92 neuron (Fig. 1d and e, note the variable spike amplitudes). Output spike trains from each neuron  
93 are then weighted by connectivity function, providing the excitatory and inhibitory inputs to the  
94 next layer (Fig. 1e, f). The overall multi-neuron spiking output of the network (Fig. 1b, right) is  
95 then treated as a response feature vector and fed to a Bayesian classifier in order to identify the  
96 original sound delivered (Fig. 1c; see Methods).

97         Given that key elements of speech such as formants and phonemes have unique spectral  
98 and temporal composition that are critical for word identification <sup>14,15</sup>, we first test how the spectro-  
99 temporal resolution and sensitivity of each network layer contribute to word recognition  
100 performance in background noise. We optimize the HSNN to maximize word recognition accuracy  
101 in the presence of noise and to identify the network organization of three key parameters that  
102 separately control the temporal and spectral resolution and the overall sensitivity of each network  
103 layer ( $l=1 \dots 6$ ). The neuron time-constant ( $\tau_l$ ), controls the temporal dynamics of each neuron  
104 element in layer  $l$  and the resulting temporal resolution of the output spiking patterns. The  
105 connectivity width ( $\sigma_l$ ) controls the convergence and divergence of synaptic connections between  
106 consecutive layers and therefore affects the spectral resolution of each layer. Since synaptic  
107 connections in the auditory system are frequency specific and localized <sup>13,16,17</sup> connectivity profiles  
108 between consecutive layers are modeled by a Gaussian profile of unknown connectivity width  
109 parameter <sup>18</sup> (Fig. 1e; specified by the SD,  $\sigma_l$ ). Finally, the sensitivity and firing rates of each layer  
110 are controlled by adjusting the spike threshold level ( $N_l$ ) of each IF neuron <sup>19</sup>. This parameter  
111 controls the firing pattern from a high firing rate dense code as proposed for the auditory periphery

112 to a sparse code as has been proposed for auditory cortex<sup>2,20</sup>. Because temporal and spectral  
113 selectivities vary systematically and gradually across auditory nuclei<sup>3,6,21</sup>, we required that the  
114 network parameters vary hierarchically and smoothly from layer-to-layer according to (see  
115 Methods: Network Constraints and Optimization)

$$\begin{aligned} 116 \quad \tau_l &= \tau_1 \cdot \alpha^{l-1} \\ 117 \quad \sigma_l &= \sigma_1 \cdot \gamma^{l-1} \\ 118 \quad N_l &= N_1 \cdot \lambda^{l-1} \end{aligned} \quad (\text{Eqn. 1})$$

119 where  $\tau_1$ ,  $\sigma_1$ , and  $N_1$  are the parameters of the first network layer and are chosen so that first layer  
120 responses mimic activity in auditory nerve fibers (see Methods). The scaling parameters  $\alpha$ ,  $\lambda$ , and  
121  $\gamma$  determine the direction and magnitude of layer-to-layer changes for each of the three neuron  
122 parameters. Scaling values greater than one indicate that the neuron parameter increases  
123 systematically across layers, a value of one indicates that the parameter is constant, while a value  
124 less than one indicates that the parameter value decreases systematically across layers.

126 The optimal network outputs preserve important time-frequency information in speech  
127 despite variability in the input sound. Sounds in the optimization and validation corpus consist of  
128 spoken words for digits from zero to nine from eight talkers (TI46 LDC Corpus<sup>22</sup>, see Methods).  
129 As a task we require that the network identify the word (i.e., the digit) that is delivered as input  
130 (10 alternative forced choice task). Example cochlear model spectrograms and the network spiking  
131 outputs are shown in Fig. 1g and h for the words *zero*, *six*, and *eight* in the presence of speech  
132 babble noise (optimal outputs at SNR=20 dB). Analogous to auditory cortex responses for speech<sup>7</sup>,  
133 the network produces a distinguishable spiking output for each sound that reflects its spectro-  
134 temporal composition (Fig. 1g). Furthermore, when a single word is generated by different talkers  
135 in noise (SNR=20 dB) the network produces a relatively consistent firing pattern (Fig. 1g) such  
136 that the response timing and active neuron channels remain relatively consistent. For instance, a

137 lack of activity is observed for neurons between  $\sim 2$ -4 kHz within the first  $\sim 100$ -200 ms of the  
138 sound for the word *zero* and several time-varying response peaks indicative of the vowel formants  
139 are observed for all three talkers (Fig. 1h).

140 To determine the network architecture required for optimal word recognition in noise and  
141 to identify whether such a configuration is essential for noise robust performance, we searched for  
142 the network scaling parameters ( $\alpha$ ,  $\lambda$ , and  $\gamma$ ) that maximize the network's word recognition  
143 accuracy in a ten-alternative forced choice task for multiple talkers (8) and in the presence of  
144 speech babble noise (signal-to-noise ratios, SNR=-5, 0, 5, 10, 15, 20 dB; see Methods). For each  
145 input sound, the network spike train outputs are treated as response feature vectors and a Bayesian  
146 classifier (Fig. 1c; see Methods) is used to read the network outputs and report the identified digit  
147 (*zero* to *nine*). The network word recognition accuracy is shown in Fig. 2 as a function of each of  
148 the network parameters ( $\alpha$ ,  $\lambda$ , and  $\gamma$ ) and SNR (**a**, SNR=5 dB; **b**, SNR=20 dB; **c**, average accuracy  
149 across all SNRs). At each SNR the word recognition accuracy profiles are tuned with the scaling  
150 parameter (i.e., concave function) which enables us to find an optimal scaling parameters that  
151 maximizes the classifier performance. Regardless of the SNR the optimal HSNN parameters are  
152 relatively constant (Fig. 2d; tested between -5 to 20 dB) implying that the network organization is  
153 relatively stable and invariant of the SNR (Fig. 2a-c; **a**=5 dB SNR, **b**=20 dB SNR, **c**=average  
154 across all SNRs). Intriguingly, several functional characteristics of the optimal network mirror  
155 those observed in the auditory pathway. Like the ascending auditory pathway where synaptic  
156 potential time-constants vary from sub-millisecond in the auditory nerve to tens of milliseconds in  
157 cortex<sup>13,23-25</sup>, time constants scale in the optimal HSNN (global optimal  $\alpha = 1.9$ ) over more than  
158 an order of magnitude between the first and last layer ( $1.9^5 = 24.8$  fold increase between the first  
159 and last layer;  $\sim 0.5$  to 12.5 ms) indicating that temporal resolution becomes progressively coarser

160 in the deep network layers. By comparison, the optimal connectivity widths do not change across  
161 layers ( $\gamma = 1.0$ ). This result suggests that for the optimal HSNN temporal resolution changes  
162 dramatically while spectral resolution remains relatively constant across network layers, mirroring  
163 changes in spectral and temporal selectivity observed along the ascending auditory pathway<sup>3-6</sup>.

164 The scaling parameters of the optimal HSNN indicate a substantial loss of temporal ( $\alpha =$   
165 1.9) and no change in connectivity resolution ( $\gamma = 1.0$ ) across network layers. This prompted us  
166 to ask how feature selectivity changes across the network layers and whether a sequential  
167 transformation in spectral and temporal selectivity is essential for optimal word recognition in  
168 noise. To quantify the sequential transformations in acoustic processing, we first measure the  
169 spectro-temporal receptive fields (STRFs) of each neuron in the network (see Methods). Example  
170 STRFs are shown for two selected frequencies across the six network layers (Fig. 3a; best  
171 frequency = 1.5 and 3 kHz). As a comparison, example STRFs from the auditory nerve (AN)<sup>26</sup>,  
172 midbrain (inferior colliculus, IC)<sup>5</sup>, thalamus (MGB) and primary auditory cortex (A1)<sup>6</sup> of cats  
173 are shown in Fig. 3e. Like auditory pathway neurons, STRFs from the optimal HSNN contain  
174 excitatory domains (red) with temporally lagged and surround inhibition/suppression (blue) along  
175 the frequency dimension (Fig. 3a). Furthermore, STRFs are substantially faster in early network  
176 layers lasting only a few milliseconds and mirroring STRFs from the auditory nerve, which have  
177 relatively short latencies and integration times. STRFs have progressively longer integration times  
178 (paired t-test with Bonferroni correction,  $p < 0.01$ ; Fig. 3b) and latencies (paired t-test with  
179 Bonferroni correction,  $p < 0.01$ ; Fig. 3c) across network layers, while bandwidths increase only  
180 slightly from the first to last layer (paired t-test with Bonferroni correction,  $p < 0.01$ ; Fig. 3d). These  
181 sequential transformations mirror changes in temporal and spectral selectivity seen between the  
182 auditory nerve, midbrain, thalamus and ultimately auditory cortex (Fig. 3e-h). As for the auditory

183 network model, integration times (Fig. 3f) and latencies (Fig. 3g) increase systematically and  
184 smoothly (paired t-test with Bonferroni correction,  $p < 0.01$ ) while bandwidths show a small but  
185 significant increase between the auditory nerve and cortex (paired t-test with Bonferroni  
186 correction,  $p < 0.01$ ), analogous to results from the computational network. Although the network  
187 trends mirror changes in spectral and temporal selectivity seen between auditory nerve and cortex,  
188 auditory receptive fields tend to be somewhat slower and narrower than the network. Such  
189 disparities may partly be attributed to mechanisms not included in the HSNN such as descending  
190 feedback<sup>27</sup>, synaptic and dendritic nonlinearities<sup>28</sup> and adaptive mechanisms such as spike time  
191 dependent plasticity, synaptic depression, and gain normalization<sup>1,29</sup>.

192

### 193 **Hierarchical and nonlinear transformations enhance robustness**

194 It is intriguing that the hierarchical loss of temporal and spectral resolution in the optimal  
195 network mirror changes in selectivity observed in the ascending auditory system, as this ought to  
196 limit the transfer of acoustic information across the network. One plausible hypothesis is that such  
197 a sequential decrease in resolution is necessary to extract invariant acoustic features in speech  
198 while rejecting noise and fine details in the acoustic signal that may contribute in a variety of  
199 hearing tasks (e.g., spatial hearing, pitch perception etc.), but ultimately don't contribute to speech  
200 recognition performance. This may be expected since human listeners require a limited set of  
201 temporal and spectral cues for speech recognition<sup>14,15</sup> and can achieve high recognition  
202 performance even when spectral and temporal resolution is degraded<sup>30,31</sup>. We thus tested the above  
203 hypothesis by comparing the optimal network performance against a high-resolution network that  
204 lacks scaling ( $\alpha = 1$ ,  $\lambda = 1$ , and  $\gamma = 1$ ) and for which we expect a minimal loss of acoustic  
205 information across layers. Unlike the optimal network, STRFs from the high-resolution network



206 are relative consistent and change minimally across layers (Supplemental Data, Fig. 1S), which  
207 supports the idea that spectrotemporal information propagates across the high-resolution network  
208 with minimal processing.

209 Figure 4 illustrates how the optimal HSNN accentuates critical spectral and temporal cues  
210 necessary for speech recognition while the high-resolution network fails to do the same. Example  
211 Bayesian likelihood time-frequency histograms (average firing probability across all excerpts of  
212 each sound at each time-frequency bin) measured at 5 dB SNR are shown for the words “three”,  
213 “four”, “five” and “nine” for both the high-resolution (Fig. 4a) and optimal (Fig. 4b) HSNN along  
214 with selected spiking outputs from a single talker. Intriguingly, the Bayesian likelihood for the  
215 high-resolution network are highly blurred in both the temporal and spectral dimensions and have  
216 similar structure for the example words (Fig. 4a, right panels). This is also seen in the individual  
217 network outputs where the high-resolution network produces a dense and saturated firing pattern  
218 (Fig. 4a) that lacks the detailed spatio-temporal pattern seen in the optimal HSNN (Fig. 4b). The  
219 optimal HSNN preserves and even accentuates key acoustic elements such as temporal transitions  
220 for voice onset timing and spectral resonances (formants) while simultaneously rejecting and  
221 filtering out the background noise (Fig. 4b, right panels).

222 We next compared the performance of the HSNN models to human subjects in an isolated  
223 monosyllabic word recognition task in speech babble noise<sup>32</sup>. The word recognition accuracy of  
224 the optimal HSNN approaches human performance and is significantly higher than the high-  
225 resolution network for all of the SNRs tested (Fig. 4 c; green=human subjects<sup>32</sup>;  $p < 0.001$ , t-test  
226 with Bonferroni correction). On average there is a 27.6 % improvement in the word accuracy rates  
227 for the optimal HSNN over the high-resolution HSNN. We also compared the accuracy of the  
228 optimal HSNN with the accuracy of a HSNN that was optimized individually at each SNR (SNR-

229 optimal HSNN). The accuracy of the SNR-optimal HSNN was not significantly different from the  
230 optimal HSNN ( $p < 0.05$ , t-test) which suggest that the optimal solution produces a stable noise  
231 robust representation. Furthermore, the optimal HSNN is on average within 11.5% of human  
232 performance in an isolated word recognition task and follows a similar performance trend across  
233 signal-to-noise ratios (Fig. 4c)<sup>32</sup>.

234 To characterize the neural transformations enabling noise robust coding, we examine how  
235 acoustic information propagates and is transformed across sequential network layers. For each  
236 layer, the spike train outputs are first fed to the Bayesian classifier in order to measure sequential  
237 changes in word recognition accuracy. In the optimal HSNN, word recognition accuracy  
238 systematically increases across layers with an average improvement of 15.5% between the first  
239 and last layer when tested at 5 dB SNR ( $p < 0.001$ , t-test; Fig. 5a, blue; 13.7% average improvement  
240 across all SNRs). By comparison, for the high-resolution HSNN, performance degrades  
241 sequentially across layers with an average decrease of 19.8% between the first and last layer  
242 ( $p < 0.001$ , t-test; Fig. 5a, red; 18.1 % average reduction across all SNRs). Thus, the optimal HSNN  
243 is capable of sequentially extracting high-level acoustic features that enhance word recognition  
244 performance in the presence of noise. In contrast, background noise persists in the spiking activity  
245 of the high-resolution network, which results in a greater performance reduction across network  
246 layers.

247 Although the classifier performance takes advantage of the hierarchical organization in the  
248 optimal HSNN, a similar trend is not observed for the transfer of acoustic information. First, firing  
249 rates decrease systematically across layers for the optimal HSNN, consistent with a sparser output  
250 representation (Fig. 5b, blue) as proposed for deep layers of the auditory pathway<sup>2,20,33</sup>. By  
251 comparison, firing rates are relatively stable across layers for the high-resolution network (Fig. 5b,

252 red). We next measure the average mutual information (see Methods) in the presence of noise (5  
253 dB) to identify how incoming acoustic information is sequentially transformed from layer-to-layer.  
254 For the optimal HSNN the information rates (i.e., bits / sec) decreases between the first and last  
255 layer (Fig. 5c, blue) whereas for the high-resolution network information is conserved across  
256 network layers (Fig. 5c, red). Thus, the layer-to-layer increase in word recognition accuracy  
257 observed for the optimal HSNN is accompanied by a loss of total acoustic information in the deep  
258 network layers. We next measure the average information conveyed by individual action potentials  
259 as way of determining how acoustic features are represented by individual precisely timed spikes.  
260 Surprisingly, the information conveyed by single action potentials is higher and increases across  
261 layers (Fig. 5d, blue). This contrast the high-resolution HSNN where information per spike  
262 remains relatively constant across layers (Fig. 5d, red). This indicates that individual action  
263 potentials become increasingly more informative from layer-to-layer in the optimal HSNN despite  
264 a reduction in firing rates. Taken together with the changes in spectro-temporal selectivity (Fig.  
265 3), the findings are consistent with the hypothesis that the optimal HSNN produces a noise resilient  
266 sparse code in which invariant acoustic features are represented with isolated spikes. By  
267 comparison, the high-resolution network produces a dense response pattern that has a tendency to  
268 preserve incoming acoustic information, including the background noise and nonessential acoustic  
269 features, thus suffering in recognition performance.

270 We next asked whether the sequential layer-to-layer transformations of the optimal HSNN  
271 are required for robust coding of speech. Hypothetically, its plausible that similar performance  
272 could be achieved with a single layer network as long as each neuron accounts for the overall  
273 network receptive field transformations. To test this, we developed single-layer networks  
274 consisting of generalized linear model neurons<sup>34</sup> with either a linear receptive field and Poisson

275 spike train generator (LP network) or a linear receptive field and nonlinear stage followed by  
276 Poisson spike train generator (LNP network) (Fig. 6a; see Methods). The performance of the LP  
277 network, which accounts for the linear transformations of the optimal HSNN, was on average  
278 21.7% lower than the optimal HSNN indicating that nonlinearities are critical to achieve high word  
279 recognition accuracy (Fig. 6b). Its plausible that this performance disparity can be overcome by  
280 incorporating a nonlinearity that models the rectifying effects in the spike generation process of  
281 neurons (LNP network). Doing so improves the performance to within 2.1% of the optimal HSNN  
282 when there is little background noise (SNR=20 dB, 85.6 % for optimal HSNN versus 82.5 % for  
283 LNP network). However, the performance degraded when background noise was added when  
284 compared to the optimal HSNN, with an overall performance reduction of 13.8 % at -5 dB SNR  
285 (58.4 % for optimal HSNN versus 44.6 % for LNP network).

286 The robustness of each network was next examined by comparing the performance of each  
287 model against human performance trends. For each condition, we measured the relative accuracy  
288 change (RAC) between the model and human performance (Methods, Fig. 6c). The RAC of the  
289 optimal HSNN was near zero with a small reduction in RAC of only 3.9% at -5 dB SNR. Thus,  
290 the optimal HSNN follows a similar trend as humans across background noise levels. By  
291 comparison, both the LP and LNP performance diverged from human performance with increasing  
292 background noise with an overall RAC reduction of 22.2 % and 15.6% at -5 dB SNR, respectively.  
293 Thus, in contrast to the optimal HSNN trends which mirrors human data, the LP and LNP network  
294 performance diverged from the human trend with increasing background noise.

295 The average performance of each network was also compared against human word  
296 recognition accuracy. The accuracy for the optimal and SNR optimal HSNNs are not significantly  
297 differences when compared against human accuracy rates with an average reduction of 9.7% and

298 11.5%, respectively ( $p > 0.05$ , t-test). Furthermore, the optimal HSNN outperformed all other  
299 models tested. The LNP, LP, and high-resolution HSNN exhibited a rank order reduction in  
300 performance relative to human accuracy (18.5 %, 33.3%, 37.2% respectively;  $p < 0.05$ , t-test with  
301 Bonferroni Correction).

302 Overall, the findings indicate that although the linear and nonlinear receptive field  
303 transformations both contribute to the overall network performance, the sequential layer-to-layer  
304 transformations carried out by the optimal HSNN are critical for maintaining a noise robust  
305 representation that mirrors human performance trends.

306

### 307 **Optimal spiking timing resolution**

308 Finally, we identified the spike timing resolution required to maximize recognition  
309 accuracy as previously identified when “reading out” neural activity in auditory cortex<sup>7,35</sup>. To do  
310 so, we synthetically manipulating the temporal resolution of the output spike trains while  
311 measuring the word recognition accuracy at multiple SNRs (see Methods). An optimal spike  
312 timing resolution is identified within the vicinity of 4-14 ms for the optimal network (Fig. 7a and  
313 b) which is comparable to spike timing precision required for sound recognition in auditory cortex  
314<sup>7,35</sup>. By comparison, the high-resolution network requires a high temporal resolution of ~2 ms to  
315 achieve maximum word accuracy (46.6% accuracy across all SNRs; Fig. 8c), which is ~ 31.8%  
316 lower on average than the optimal network (78.4 % accuracy for the optimal HSNN across all  
317 SNRs). Taken across all SNRs, the optimal temporal resolution that maximized word accuracy  
318 rates is 6.5 ms, which is comparable to the spike timing resolution reported for optimal speech and  
319 vocalizations recognition in auditory cortex<sup>7,35</sup>.

320

## 321 Discussion

322 The results demonstrate that the hierarchical organization of the ascending auditory system  
323 is consistent with a near optimal strategy for feature extraction that maximizes sound recognition  
324 performance and is relatively impervious to noise. Upon optimizing the network organization on  
325 a behaviorally relevant word recognition task, the HSNN achieves high recognition accuracy and  
326 follows a similar noise robust trend that is within ~10% of human performance by sequentially  
327 refining the spectral and temporal selectivity from layer-to-layer. Similar noise robustness is not  
328 replicated with conventional receptive field based networks even when the receptive fields capture  
329 the linear integration of the optimal HSNN and a threshold nonlinearity was imposed. The  
330 sequential nonlinear transformations of the optimal HSNN preserve critical acoustic features for  
331 speech recognition while simultaneously discarding acoustic noise not relevant to the sound  
332 recognition task. These transformations mirror changes in selectivity along the ascending auditory  
333 pathway, including an extensive loss of temporal resolution<sup>3</sup>, slight loss of spectral resolution<sup>4-6</sup>,  
334 and increase in sparsity<sup>2,20</sup>. The simulations suggest that the orderly arrangement of receptive  
335 fields and sequential nonlinear transformations of the ascending auditory pathway may be critical  
336 to achieve a noise robust code.

337 Critical to our findings is the observation that the optimal network transformations  
338 described here are not expected a priori as a general sensory processing strategy and may in fact  
339 be unique to audition. For instance, changes in temporal selectivity between the retina, visual  
340 thalamus, and visual cortex are generally small and neurons in the visual pathway synchronize  
341 over a relatively narrow range of frequencies (typically < 20 Hz)<sup>36-39</sup>. This differs dramatically  
342 from the observed increase in integration times reported here, systematic increase in synaptic  
343 potential time-constants<sup>13,23-25</sup>, and a corresponding reduction in synchronization ability<sup>3</sup>

344 observed between the auditory nerve and auditory cortex. By comparison, in the spatial domain,  
345 there is substantial divergence in connectivity between the retina and visual cortex since visual  
346 receptive fields sequentially grow in size between the periphery and cortex so as to occupy a larger  
347 area of retinotopic space<sup>40-42</sup>. This contrasts changes in frequency receptive fields in which only  
348 a subtle increase in average bandwidth is observed between the auditory nerve and cortex<sup>4-6,21,26</sup>,  
349 consistent with findings from the optimal sound recognition strategy.

350         The findings outline a biologically plausible auditory coding strategy capable of efficiently  
351 achieving high recognition accuracy, particularly in the presence of noise. Although the auditory  
352 pathway is substantially more complex than the proposed HSSN, which lacks anatomical elements  
353 such as the binaural circuits in the brainstem and descending feedback, it is nonetheless surprising  
354 that the optimal strategy for speech recognition replicates sequential transformations observed  
355 along the auditory pathway. Furthermore, whereas auditory receptive fields can be more diverse  
356 than those of the HSNN, the receptive fields of the optimal HSSN nonetheless contain basic  
357 features seen across the auditory pathway including lateral inhibition, temporal inhibition or  
358 suppression, and sequentially increasing time-constants along the hierarchy<sup>6,26,43-45</sup>. The HSSN  
359 employs several computational principles observed anatomically and physiologically, including  
360 the presence of spiking neurons, inhibitory connections, cotuning between excitation and  
361 inhibition, and a frequency specific localized circuitry, all of which likely contribute to its high  
362 performance. Furthermore, these sequential transformations appear to be critical since single layer  
363 generalized linear models designed to capture the overall transformations of the HSNN did not  
364 achieve comparable levels of performance.

365         Recent advances in deep neural networks (DNN) have made it possible to achieve high-  
366 levels of speech recognition performance approaching human performance limits<sup>46,47</sup>. Yet, these

367 networks typically require tens-of-thousands of neurons and parameters to do so and the  
368 mechanisms leading to high recognition accuracy are based on neuron elements designed on  
369 principles of rate coding. The HSNN developed here, by comparison, employs temporal coding  
370 and organizational principles identified physiologically and approaches human performance levels  
371 with just 600 neurons and three meta-parameters that control the layer-to-layer transformations.  
372 Like the auditory pathway, the auditory HSNN is inherently temporal as it contains spiking  
373 neurons capable of precisely synchronizing to the sound features and exhibit hierarchical changes  
374 in time-scale across layers observed physiologically<sup>3</sup>. Furthermore, whereas DNNs rely on strictly  
375 excitatory connection weights between neuron, feature extraction in the HSNN is shaped by both  
376 excitatory and inhibitory circuitry as observed in central auditory structures<sup>10-13</sup>. A challenge for  
377 future studies is to further reveal biologically realistic strategies for auditory signal processing,  
378 feature extraction, and classification, including descending feedback<sup>27</sup> and adaptive mechanisms  
379<sup>1,29</sup>, that together endow perceptual capabilities for sound recognition and promote robust coding.

380

## 381 **Materials and Methods**

382 **Speech Corpus:** Sounds in the experimental dataset consist of isolated digits (*zero to nine*) from  
383 eight male talkers from LDC TI46 corpus<sup>22</sup>. Ten utterances for each digit are used for a total of  
384 800 sounds (8 talkers x 10 digits/subject x 10 utterances/digit). Words are temporally aligned based  
385 on the waveform onset (first upward crossing that exceeds 2 SD of the background noise level)  
386 and speech babble noise (generated by adding 7 randomly selected speech segments) is added at  
387 multiple signal-to-noise ratios (SNR=-5, 0, 5, 10, 15 and 20 dB). This range of SNR was selected  
388 to allow comparisons with human isolated word recognition performance in the presence of speech  
389 babble noise<sup>32</sup>.



390

391 **Auditory Model and Hierarchical spiking neural Network (HSNN):** We developed a multi-  
392 layer auditory network model consisting of a cochlear model stage containing gamma tone filters  
393 (0.1-4kHz; center frequencies  $1/10^{\text{th}}$  octave separation; critical band resolution), envelope  
394 extraction and nonlinear compression<sup>48</sup> followed by a HSNN as illustrated in Fig. 1. Several  
395 architectural and functional constraints are imposed on the spiking neural network to mirror  
396 auditory circuitry and physiology. First, the network contains six layers as there are six principal  
397 nuclei between the cochlea and cortex. Second, connections between consecutive layers contain  
398 both excitatory and inhibitory projections since long-range inhibitory projections between nuclei  
399 are pervasive in the ascending auditory system<sup>10,49</sup>. Each layer in the network contains 53  
400 excitatory and 53 inhibitory frequency organized neurons per layer which allows for  $1/10^{\text{th}}$  octave  
401 resolution over the frequency range of the cochlear model (0.1-4 kHz). Furthermore, since  
402 ascending projections in the central auditory pathway are spatially localized and frequency specific  
403<sup>18,49,50</sup>, excitatory and inhibitory connection weights are modeled by co-tuned Gaussian profiles of  
404 unspecified connectivity width (Fig. 1e):

405

$$406 \quad w_{l,m,n}^E = \frac{1}{\sqrt{2\pi\sigma_E^2}} \cdot e^{-(x_{l,m}-x_{l+1,n})^2/2\sigma_E^2}$$

$$407 \quad w_{l,m,n}^I = \frac{1}{\sqrt{2\pi\sigma_I^2}} \cdot e^{-(x_{l,m}-x_{l+1,n})^2/2\sigma_I^2}$$

408

409 where  $w_{l,m,n}^I$  and  $w_{l,m,n}^E$  are the inhibitory and excitatory connection weights between the  $m$ -th  
410 and  $n$ -th neuron from layer  $l$  and  $l+1$ ,  $x_{l,m}$  and  $x_{l+1,n}$  are the normalized spatial positions (0-1)  
411 along the frequency axis of the  $m$ -th and  $n$ -th neurons in layers  $l$  and  $l+1$ , and  $\sigma_I$  and  $\sigma_E$  are the

412 inhibitory and excitatory connectivity widths (i.e., SD of Gaussian connection profiles), which  
413 determine the spatial spread and ultimately the frequency resolution of the ascending connections.

414 Each neuron in the network consists of a modified leaky integrate-and-fire (LIF) neuron<sup>51</sup>  
415 receiving excitatory and inhibitory presynaptic inputs (Fig. 1e). Given a presynaptic spike trains  
416 from the  $m$ -th neurons in network layer- $l$  ( $s_{l,m}(t)$ ) the desired intracellular voltage of the  $n$ -th  
417 neuron in network layer  $l+1$  is obtained as

418

$$419 \quad v_{l+1,n}(t) = \sum_m w_{l,m,n}^E \cdot h_{EPSP}(t) * s_{l,m}(t) - \beta \sum_m w_{l,m,n}^I \cdot h_{IPSP}(t) * s_{l,m}(t)$$

420

421 where  $*$  is the convolution operator,  $\beta$  is a weighting ratio between the injected excitatory and  
422 inhibitory currents,  $h_{EPSP}(t)$  and  $h_{IPSP}(t)$  are temporal kernels that model excitatory and  
423 inhibitory post synaptic potentials generated for each incoming spike as an alpha function (Fig. 1e,  
424 red and blue curves)<sup>51</sup>. Since central auditory receptive fields often have extensive lateral  
425 inhibition/suppression beyond the central excitatory tuning area and inhibition is longer lasting  
426 and weaker<sup>5,6</sup> we require that  $\sigma_I = 1.5 \cdot \sigma_E$ ,  $\tau_I = 1.5 \cdot \tau_E$ , and  $\beta = 2/3$ , as this produced realistic  
427 receptive field measurements. For simplicity, we use  $\sigma$  and  $\tau$  interchangeably with  $\sigma_E$  and  $\tau_E$ ,  
428 since these determine the overall spectral and temporal resolution of each neuron.

429 Because the input to an LIF neuron is a current injection, we derived the injected current  
430 by deconvolving the LIF neuron time-constant from the desired membrane voltage

431

$$432 \quad i_{l+1,n}(t) = v_{l+1,n}(t) * h^{-1}(t) + z(t).$$

433

434 where  $i_{l+1,n}(t)$  is the injected current for the  $n$ -th neuron in layer  $l+1$  and  $v_{l+1,n}(t)$  is the  
435 corresponding output voltage and  $z(t)$  is a noise current component. As we demonstrated  
436 previously<sup>19</sup>, this procedure removes the influence of the cell membrane integration prior to  
437 injecting the current in the IF neuron compartment and allows us to precisely control the  
438 intracellular voltage delivered to each LIF neuron. Above  $h(t) = \frac{1}{C} e^{-t/\tau} u(t)$  is the impulse  
439 response of the cell membrane ( $u(t)$  is the step function),  $C$  is the membrane capacitance,  $\tau$ , is the  
440 membrane time-constant and  $h^{-1}(t)$  is the inverse kernel (i.e.,  $h(t) * h^{-1}(t) = \delta(t)$  where  $\delta(t)$   
441 is the Diract function). Because the EPSP time constant and the resulting temporal resolution of  
442 the intracellular voltage are largely influenced by the cell membrane integration, we require that  
443  $\tau = \tau_E$ . Finally, Gaussian white noise,  $z(t)$ , is added to the injected current in order to generate  
444 spike timing variability (signal-to-noise ratio=15 dB)<sup>19</sup>. Upon injecting the current, the resulting  
445 intracellular voltage follows  $v_{l+1,n}(t) + z(t) * h(t)$  and the IF model generates spikes whenever  
446 the intracellular voltage exceeds a normalized threshold value<sup>19</sup>. The normalized threshold is  
447 specified for each network layer ( $l$ ) as

448

$$449 \quad N_l = (V_T - V_r) / \sigma_{V,l}$$

450

451 where  $V_T = -45$  mV is the threshold voltage,  $V_r = -65$  mV is the membrane resting potentials,  
452 and  $\sigma_{V,l}$  is the standard deviation of the intracellular voltages for the population of neurons in layer  
453  $l$ . As demonstrated previously, this normalized threshold represents the number of standard  
454 deviations the intracellular activity is away from the threshold activation and serves as a way of  
455 controlling the output sensitivity of each network layer. Upon generating a spike, the voltage is

456 reset to the resting potential, a 1 ms refractory period is imposed, and the membrane temporal  
457 integration continues.

458

459 **Decision model:** The neural outputs of the network consist of a spatio-temporal spiking pattern  
460 (e.g., Fig. 1g and h, bottom panels), which is expressed as a  $N \times M$  matrix  $\mathbf{R}$  with elements  $r_{n,i}$   
461 where  $N=53$  is the number of frequency organized output neurons and  $M$  is the number of time  
462 bins. The number of time bins is dependent on the temporal resolution for each bin,  $\Delta t$ , which is  
463 varied between 0.5 – 100 ms. Each response ( $r_{n,i}$ ;  $n$  – th neuron and  $i$  – th time bin) is assigned  
464 a 1 or 0 value indicating the presence or absence of spikes, respectively.

465 A modified Bernoulli Naïve Bayes classifier<sup>52</sup> is used to read out the network spike trains  
466 and categorize individual speech words. The classified digit ( $y$ ) is the one that maximizes posterior  
467 probability for a particular response according to

468

$$469 \quad y = \operatorname{argmax}_{d=\{0\dots9\}} \prod_{n,i} p_{d,n,i}^{r_{n,i}} \cdot (1 - p_{d,n,i})^{1-r_{n,i}}$$

470

471 where  $d=0 \dots 9$  are the digits to be identified,  $p_{d,n,i}$  is the Bayesian likelihood, i.e. the probability  
472 that a particular digit,  $d$ , generates a spike (1) in a particular spatio-temporal bin ( $n$ -th neuron and  
473  $i$ -th time bin).

474

475 **Network Constraints and Optimization:** The primary objective is to determine the spectral and  
476 temporal resolution of the network connections as well as the network sensitivity necessary for  
477 robust speech recognition. Specifically, we hypothesize that the temporal and spectral resolution  
478 and sensitivity of each network layer need to be hierarchically organized across network layers in

479 order to maximize speech recognition performance in the presence of noise. We thus optimize  
480 three key parameters, the time constant ( $\tau_l$ ), connectivity widths ( $\sigma_l$ ), and normalized threshold  
481 ( $N_l$ ) that separately control these functional attributes of the network, where the index  $l$  designates  
482 the network layer (1-6). Given that spectro-temporal selectivity changes systematically and  
483 gradually between auditory nuclei, we constrained the parameters to vary smoothly from layer-to-  
484 layer according to the power law rules of Eqn. 1. The initial parameters for the first network layer,  
485  $\tau_1 = 0.4$  ms,  $\sigma_1 = 0.0269$  (equivalent to  $\sim 1/6$  octave), and  $N_1 = 0.5$ , are selected to allow for  
486 high-temporal and spectral resolution and high firing rates, analogous to physiological  
487 characteristics of auditory nerve fibers<sup>3,4,26</sup> and inner hair cell ribbon synapse<sup>23</sup>. We optimize for  
488 the three scaling parameters  $\alpha$ ,  $\lambda$ , and  $\gamma$ , which determine the direction and magnitude of layer-to-  
489 layer changes and ultimately the network organization rules for temporal and spectral resolution  
490 and network sensitivity.

491 The optimization is carried using a cross-validation grid search procedure in which we  
492 maximized word accuracy rates (WAR). Initial tests are performed to determine a suitable search  
493 range for the scaling parameters and a final global search is performed over the resulting search  
494 space ( $\alpha = 0.9 - 2.3$ ,  $\lambda = 0.5 - 1.6$  and  $\gamma = 0.8 - 1.5$ ; 0.1 step size for all parameters). For each  
495 parameter combination, the network is required to identify the digits in the speech corpus with a  
496 ten-alternative forced choice task. For each iteration we select one utterance from the speech  
497 corpus (1 of 800) for validation and use the remaining utterances (799) to train the model by  
498 deriving the Bayesian likelihood functions (i.e.,  $p_{d,n,i}$ ). The Bayesian classifier is then used to  
499 identify the validation utterances and compute WAR for that iteration (either 0 or 100% for each  
500 iteration). This procedure is iteratively repeated 800 times over all of the available utterances and  
501 the overall WAR is computed as the average over all iterations. This procedure is also repeated for

502 five distinct signal-to-noise ratios (SNR=-5, 0, 5, 10, 20 dB). Example curves showing the WAR  
503 as a function of scaling parameters and SNR are shown in Fig. 2 (**a** and **b**, shown for 5 and 20dB).  
504 The global optimal solution for the scaling parameters is obtained by averaging WAR across all  
505 SNRs and selecting the scaling parameter combinations that maximize the WAR (Fig. 2c).

506

507 **Receptive Field and Mutual Information Calculation:** To characterize the layer-to-layer  
508 transformations performed by the network, we compute spectro-temporal receptive fields (STRFs)  
509 and measure the mutual information conveyed by each neuron in the network. First, STRFs are  
510 obtained by delivering dynamic moving ripple sounds (DMR), which are statistically unbiased,  
511 and cross-correlating the output spike trains of each neuron with the DMR spectrotemporal  
512 envelope<sup>53</sup>. For each STRF, we estimate the temporal and spectral resolution by computing the  
513 integration time and bandwidths, as described previously<sup>5</sup>. Mutual information is calculated by  
514 delivering a sequence of digits (0 to 9) at 5 dB SNR to the network. The procedure is repeated 50  
515 trials with different noise seeds and the spike trains from each neuron are converted into a dot-  
516 raster sampled at 2 ms temporal resolution. The mutual information is calculated for each neuron  
517 in the network using the procedure of Strong et al.<sup>54</sup> as described previously<sup>19</sup>.

518

519 **Auditory System Data:** Previously published data from single neurons in the auditory nerve  
520 ( $n=214$ )<sup>26</sup>, auditory midbrain (Central Nucleus of the Inferior Colliculus,  $n=125$ )<sup>48</sup>, thalamus  
521 (Medial Geniculate Body,  $n=88$ ) and primary auditory cortex ( $n=83$ )<sup>6</sup> is used to quantify  
522 transformations in spectral and temporal selectivity between successive auditory nuclei. Using the  
523 measured spectro-temporal receptive fields of each neuron (Fig. 3), the spectral and temporal  
524 selectivity are quantified by computing integration times, response latencies, and bandwidths as

525 described previously<sup>5</sup>. Sequential changes in selectivity across ascending auditory nuclei are  
526 summarized by comparing the neural integration parameters of each auditory structure (Fig. 3f-h).

527

528 **Generalized Linear Model (GLM) Networks:** To identify the role of linear and nonlinear  
529 receptive field transformations for noise robust coding, we developed two single-layers networks  
530 containing GLM neurons<sup>34</sup> (Fig. 6a) that are designed to capture linear and nonlinear  
531 transformations of the HSNN.

532 First, we developed a single-layer LP (linear Poisson) network consisting of model neurons  
533 with linear spectro-temporal receptive fields followed by a Poisson spike train generator (Fig. 6a).  
534 For each output of the optimal network ( $m$ -th output) we measured the STRF and fitted it to a  
535 Gabor model ( $STRF_m(t, f_k)$ )<sup>43</sup>. On average the fitted Gabor model accurately replicated the  
536 structure in the measured STRFs and on average accounted for 99% of the STRF variance (range  
537 94-99.9%). The output firing rate of the  $m$ -th LP model neuron is obtained as

538

$$539 \quad \lambda_m(t) = \lambda_0 + G \cdot \sum_{k=1}^N S(t, f_k) * STRF_m(t, f_k)$$

540

541 where  $S(t, f_k)$  is the cochlear model output,  $*$  is the convolution operator,  $G$  is a gain term, and  $\lambda_0$   
542 is required to assure that the spike rates are strictly positive and the firing maintains a linear  
543 relationship with the sound.  $G$  and  $\lambda_0$  are chosen so that the average firing rate taken across all  
544 output neurons and sounds matches the average firing rate of the optimal network and are strictly  
545 greater than zero. The firing rate functions for each channel,  $\lambda_m(t)$ , are then passed through a  
546 nonhomogenous Poisson point process in order to generate the spike trains for each output channel.

547 Next we explored the role of nonlinear rectification by incorporating a rectification stage  
548 in the LP model. The firing of the m-th neuron in the LNP (linear nonlinear Poisson) network is  
549

$$550 \quad \lambda_m(t) = G \cdot \max \left[ 0, \sum_{k=1}^N S(t, f_k) * STRF_m(t, f_k) \right]$$

551  
552 where the gain term,  $G$ , was chosen so that the average firing rate taken across all output neurons  
553 and all words matches the average firing rate of the optimal HSNN.

554  
555 **Human Subject Data Comparison:** Data was obtained from human subjects in an isolated  
556 monosyllabic word recognition task in the presence of speech babble noise<sup>32</sup>. To enable  
557 comparison with the HSNN model conditions that we optimized for and tested (-5, 0, 5, 10, 20 dB  
558 SNR), human data (-6, -3, 0, 3, 6 dB SNR and quiet) was fit to sigmoidal function and word  
559 accuracy rate values were estimated for human subjects at the model conditions tested. The  
560 sigmoid function fit accurately accounted for the human performance data with an average error of  
561 0.9%. The average performance and trends with SNR of each model was compared against human  
562 performance set as a reference benchmark. The robustness of each model was also assessed by  
563 comparing how the word accuracy versus SNR trends deviate from human performance. The  
564 relative accuracy change  $RAC = (A_{\text{model}} - A_{\text{human}}) - (A_{\text{model}}^{20\text{dB}} - A_{\text{human}}^{20\text{dB}})$  was used to measure the  
565 divergence of each model across SNR when compared against human accuracy rates (i.e., Fig. 6c).  
566 An RAC of 0 indicates that the model performance follows a similar noise robust trend when  
567 compared to humans. Values  $<0$  indicate that the model accuracy deviated (in units of %) from the  
568 human trend.

569



570

571 REFERENCES

- 572 1 Mesgarani, N., David, S. V., Fritz, J. B. & Shamma, S. A. Mechanisms of noise robust  
573 representation of speech in primary auditory cortex. *Proc Natl Acad Sci U S A* **111**,  
574 6792-6797, doi:10.1073/pnas.1318017111 (2014).
- 575 2 Schneider, D. M. & Woolley, S. M. Sparse and background-invariant coding of  
576 vocalizations in auditory scenes. *Neuron* **79**, 141-152,  
577 doi:10.1016/j.neuron.2013.04.038 (2013).
- 578 3 Joris, P. X., Schreiner, C. E. & Rees, A. Neural processing of amplitude-modulated  
579 sounds. *Physiol Rev* **84**, 541-577 (2004).
- 580 4 Mc Laughlin, M., Van de Sande, B., van der Heijden, M. & Joris, P. X. Comparison of  
581 bandwidths in the inferior colliculus and the auditory nerve. I. Measurement using a  
582 spectrally manipulated stimulus. *J Neurophysiol* **98**, 2566-2579 (2007).
- 583 5 Rodriguez, F. A., Read, H. L. & Escabi, M. A. Spectral and temporal modulation  
584 tradeoff in the inferior colliculus. *J Neurophysiol* **103**, 887-903,  
585 doi:10.1152/jn.00813.2009 (2010).
- 586 6 Miller, L. M., Escabi, M. A., Read, H. L. & Schreiner, C. E. Spectrotemporal receptive  
587 fields in the lemniscal auditory thalamus and cortex. *J Neurophysiol* **87**, 516-527  
588 (2002).
- 589 7 Engineer, C. T. *et al.* Cortical activity patterns predict speech discrimination ability.  
590 *Nat Neurosci* **11**, 603-608, doi:nn.2109 [pii]  
591 10.1038/nn.2109 (2008).
- 592 8 Sachs, M. B., Voigt, H. F. & Young, E. D. Auditory nerve representation of vowels in  
593 background noise. *J Neurophysiol* **50**, 27-45 (1983).
- 594 9 Delgutte, B. & Kiang, N. Y. Speech coding in the auditory nerve: I. Vowel-like sounds.  
595 *J Acoust Soc Am* **75**, 866-878 (1984).
- 596 10 Winer, J. A., Saint Marie, R. L., Larue, D. T. & Oliver, D. L. GABAergic feedforward  
597 projections from the inferior colliculus to the medial geniculate body. *Proc Natl Acad*  
598 *Sci U S A* **93**, 8005-8010 (1996).
- 599 11 Loftus, W. C., Bishop, D. C., Saint Marie, R. L. & Oliver, D. L. Organization of binaural  
600 excitatory and inhibitory inputs to the inferior colliculus from the superior olive. *J*  
601 *Comp Neurol* **472**, 330-344 (2004).
- 602 12 Oswald, A. M., Schiff, M. L. & Reyes, A. D. Synaptic mechanisms underlying auditory  
603 processing. *Curr Opin Neurobiol* **16**, 371-376, doi:10.1016/j.conb.2006.06.015  
604 (2006).
- 605 13 Wehr, M. & Zador, A. M. Balanced inhibition underlies tuning and sharpens spike  
606 timing in auditory cortex. *Nature* **426**, 442-446 (2003).
- 607 14 Elliott, T. M. & Theunissen, F. E. The modulation transfer function for speech  
608 intelligibility. *PLoS Comput Biol* **5**, e1000302, doi:10.1371/journal.pcbi.1000302  
609 (2009).
- 610 15 Chi, T., Gao, Y., Guyton, M. C., Ru, P. & Shamma, S. Spectro-temporal modulation  
611 transfer functions and speech intelligibility. *J Acoust Soc Am* **106**, 2719-2732 (1999).
- 612 16 Tan, A. Y., Zhang, L. I., Merzenich, M. M. & Schreiner, C. E. Tone-evoked excitatory  
613 and inhibitory synaptic conductances of primary auditory cortex neurons. *J*  
614 *Neurophysiol* **92**, 630-643, doi:10.1152/jn.01020.2003

- 615 01020.2003 [pii] (2004).  
616 17 Xie, R., Gittelman, J. X. & Pollak, G. D. Rethinking tuning: in vivo whole-cell recordings  
617 of the inferior colliculus in awake bats. *J Neurosci* **27**, 9469-9481, doi:27/35/9469  
618 [pii]  
619 10.1523/JNEUROSCI.2865-07.2007 (2007).  
620 18 Levy, R. B. & Reyes, A. D. Spatial profile of excitatory and inhibitory synaptic  
621 connectivity in mouse primary auditory cortex. *J Neurosci* **32**, 5609-5619,  
622 doi:10.1523/JNEUROSCI.5158-11.2012 (2012).  
623 19 Escabi, M. A., Nassiri, R., Miller, L. M., Schreiner, C. E. & Read, H. L. The contribution  
624 of spike threshold to acoustic feature selectivity, spike information content, and  
625 information throughput. *J Neurosci* **25**, 9524-9534, doi:10.1523/JNEUROSCI.1804-  
626 05.2005 (2005).  
627 20 Hromadka, T., Deweese, M. R. & Zador, A. M. Sparse representation of sounds in the  
628 unanesthetized auditory cortex. *PLoS biology* **6**, e16, doi:07-PLBI-RA-1814 [pii]  
629 10.1371/journal.pbio.0060016 (2008).  
630 21 Escabi, M. A. & Read, H. L. Neural mechanisms for spectral analysis in the auditory  
631 midbrain, thalamus, and cortex. *Int Rev Neurobiol* **70**, 207-252, doi:10.1016/S0074-  
632 7742(05)70007-6 (2005).  
633 22 Liberman, M. e. a. (ed Linguistics Data Symposium) (NIST Speech Disc 7-1.1 (1  
634 disc) 1991).  
635 23 Grant, L., Yi, E. & Glowatzki, E. Two modes of release shape the postsynaptic  
636 response at the inner hair cell ribbon synapse. *J Neurosci* **30**, 4210-4220,  
637 doi:10.1523/JNEUROSCI.4439-09.2010 (2010).  
638 24 Franken, T. P., Roberts, M. T., Wei, L., Golding, N. L. & Joris, P. X. In vivo coincidence  
639 detection in mammalian sound localization generates phase delays. *Nat Neurosci* **18**,  
640 444-452, doi:10.1038/nn.3948 (2015).  
641 25 Geis, H. R. & Borst, J. G. Intracellular responses of neurons in the mouse inferior  
642 colliculus to sinusoidal amplitude-modulated tones. *J Neurophysiol* **101**, 2002-2016,  
643 doi:90966.2008 [pii]  
644 10.1152/jn.90966.2008 (2009).  
645 26 Kim, P. J. & Young, E. D. Comparative analysis of spectro-temporal receptive fields,  
646 reverse correlation functions, and frequency tuning curves of auditory-nerve fibers.  
647 *J Acoust Soc Am* **95**, 410-422 (1994).  
648 27 Suga, N. Role of corticofugal feedback in hearing. *J Comp Physiol A Neuroethol Sens*  
649 *Neural Behav Physiol* **194**, 169-183, doi:10.1007/s00359-007-0274-2 (2008).  
650 28 Reyes, A. Influence of dendritic conductances on the input-output properties of  
651 neurons. *Annu Rev Neurosci* **24**, 653-675 (2001).  
652 29 Rabinowitz, N. C., Willmore, B. D., Schnupp, J. W. & King, A. J. Contrast gain control in  
653 auditory cortex. *Neuron* **70**, 1178-1191, doi:S0896-6273(11)00435-1 [pii]  
654 10.1016/j.neuron.2011.04.030 (2011).  
655 30 Shannon, R. V., Zeng, F. G., Kamath, V., Wygonski, J. & Ekelid, M. Speech recognition  
656 with primarily temporal cues. *Science* **270**, 303-304 (1995).  
657 31 Drullman, R., Festen, J. M. & Plomp, R. Effect of temporal envelope smearing on  
658 speech reception. *J Acoust Soc Am* **95**, 1053-1064 (1994).

- 659 32 Crandell, C. C. & Smaldino, J. J. Classroom Acoustics for Children With Normal  
660 Hearing and With Hearing Impairment. *Lang Speech Hear Serv Sch* **31**, 362-370,  
661 doi:10.1044/0161-1461.3104.362 (2000).
- 662 33 Chen, C., Read, H. L. & Escabi, M. A. Precise feature based time scales and frequency  
663 decorrelation lead to a sparse auditory code. *J Neurosci* **32**, 8454-8468,  
664 doi:10.1523/JNEUROSCI.6506-11.2012 (2012).
- 665 34 Simoncelli, E. P., Paninski, L., Pillow, J. W. & Schwartz, O. Characterization of Neural  
666 Responses with Stochastic Stimuli. *The New Cognitive Neuroscience* **3**, 327-338  
667 (2004).
- 668 35 Narayan, R., Grana, G. & Sen, K. Distinct time scales in cortical discrimination of  
669 natural sounds in songbirds. *J Neurophysiol* **96**, 252-258, doi:01257.2005 [pii]  
670 10.1152/jn.01257.2005 (2006).
- 671 36 DeAngelis, G. C., Ohzawa, I. & Freeman, R. D. Spatiotemporal organization of simple-  
672 cell receptive fields in the cat's striate cortex. II. Linearity of temporal and spatial  
673 summation. *J Neurophysiol* **69**, 1118-1135 (1993).
- 674 37 Cai, D., DeAngelis, G. C. & Freeman, R. D. Spatiotemporal receptive field organization  
675 in the lateral geniculate nucleus of cats and kittens. *J Neurophysiol* **78**, 1045-1061  
676 (1997).
- 677 38 Derrington, A. M. & Lennie, P. The influence of temporal frequency and adaptation  
678 level on receptive field organization of retinal ganglion cells in cat. *J Physiol* **333**,  
679 343-366 (1982).
- 680 39 Dawis, S., Shapley, R., Kaplan, E. & Tranchina, D. The receptive field organization of  
681 X-cells in the cat: spatiotemporal coupling and asymmetry. *Vision Res* **24**, 549-564  
682 (1984).
- 683 40 Motter, B. C. Central V4 receptive fields are scaled by the V1 cortical magnification  
684 and correspond to a constant-sized sampling of the V1 surface. *J Neurosci* **29**, 5749-  
685 5757, doi:10.1523/JNEUROSCI.4496-08.2009 (2009).
- 686 41 Alonso, J. M., Usrey, W. M. & Reid, R. C. Rules of connectivity between geniculate cells  
687 and simple cells in cat primary visual cortex. *J Neurosci* **21**, 4002-4015 (2001).
- 688 42 Usrey, W. M., Reppas, J. B. & Reid, R. C. Specificity and strength of retinogeniculate  
689 connections. *J Neurophysiol* **82**, 3527-3540 (1999).
- 690 43 Qiu, A., Schreiner, C. E. & Escabi, M. A. Gabor analysis of auditory midbrain receptive  
691 fields: spectro-temporal and binaural composition. *J Neurophysiol* **90**, 456-476,  
692 doi:10.1152/jn.00851.2002  
693 00851.2002 [pii] (2003).
- 694 44 Depireux, D. A., Simon, J. Z., Klein, D. J. & Shamma, S. A. Spectro-temporal response  
695 field characterization with dynamic ripples in ferret primary auditory cortex. *J*  
696 *Neurophysiol* **85**, 1220-1234 (2001).
- 697 45 Sen, K., Theunissen, F. E. & Doupe, A. J. Feature analysis of natural sounds in the  
698 songbird auditory forebrain. *J Neurophysiol* **86**, 1445-1458 (2001).
- 699 46 Dahl, G. E., Yu, D., Deng, L. & Acero, A. Context-dependent pre-trained deep neural  
700 networks for large-vocabulary speech recognition. *IEEE Trans Audio, Speech and*  
701 *Language Processing* **20**, 30-42 (2011).
- 702 47 Hinton, G. *et al.* Deep neural networks for acoustic modeling in speech recognition:  
703 The shared views of four research groups. *Signal Processing Magazine, IEEE* **29**, 82-  
704 97 (2012).

- 705 48 Rodriguez, F. A., Chen, C., Read, H. L. & Escabi, M. A. Neural modulation tuning  
706 characteristics scale to efficiently encode natural sound statistics. *J Neurosci* **30**,  
707 15969-15980, doi:10.1523/JNEUROSCI.0966-10.2010 (2010).
- 708 49 Oliver, D. L. Ascending efferent projections of the superior olivary complex. *Microsc*  
709 *Res Tech* **51**, 355-363 (2000).
- 710 50 Read, H. L., Miller, L. M., Schreiner, C. E. & Winer, J. A. Two thalamic pathways to  
711 primary auditory cortex. *Neuroscience* **152**, 151-159, doi:S0306-4522(07)01472-8  
712 [pii]  
713 10.1016/j.neuroscience.2007.11.026 (2008).
- 714 51 Trappenberg, T. *Fundamentals of Computational Neuroscience*. 2nd edn, (Oxford  
715 University Press, 2010).
- 716 52 McCallum, A. & Nigam, K. in *AAAI-98 workshop on learning for text categorization*  
717 Vol. 752 (1998).
- 718 53 Escabi, M. A. & Schreiner, C. E. Nonlinear spectrotemporal sound analysis by  
719 neurons in the auditory midbrain. *J Neurosci* **22**, 4114-4131, doi:20026325  
720 22/10/4114 [pii] (2002).
- 721 54 Strong, S. P., de Ruyter van Steveninck, R. R., Bialek, W. & Koberle, R. On the  
722 application of information theory to neural spike trains. *Pac Symp Biocomput*, 621-  
723 632 (1998).
- 724  
725

Fig1, Khatami; Escabi

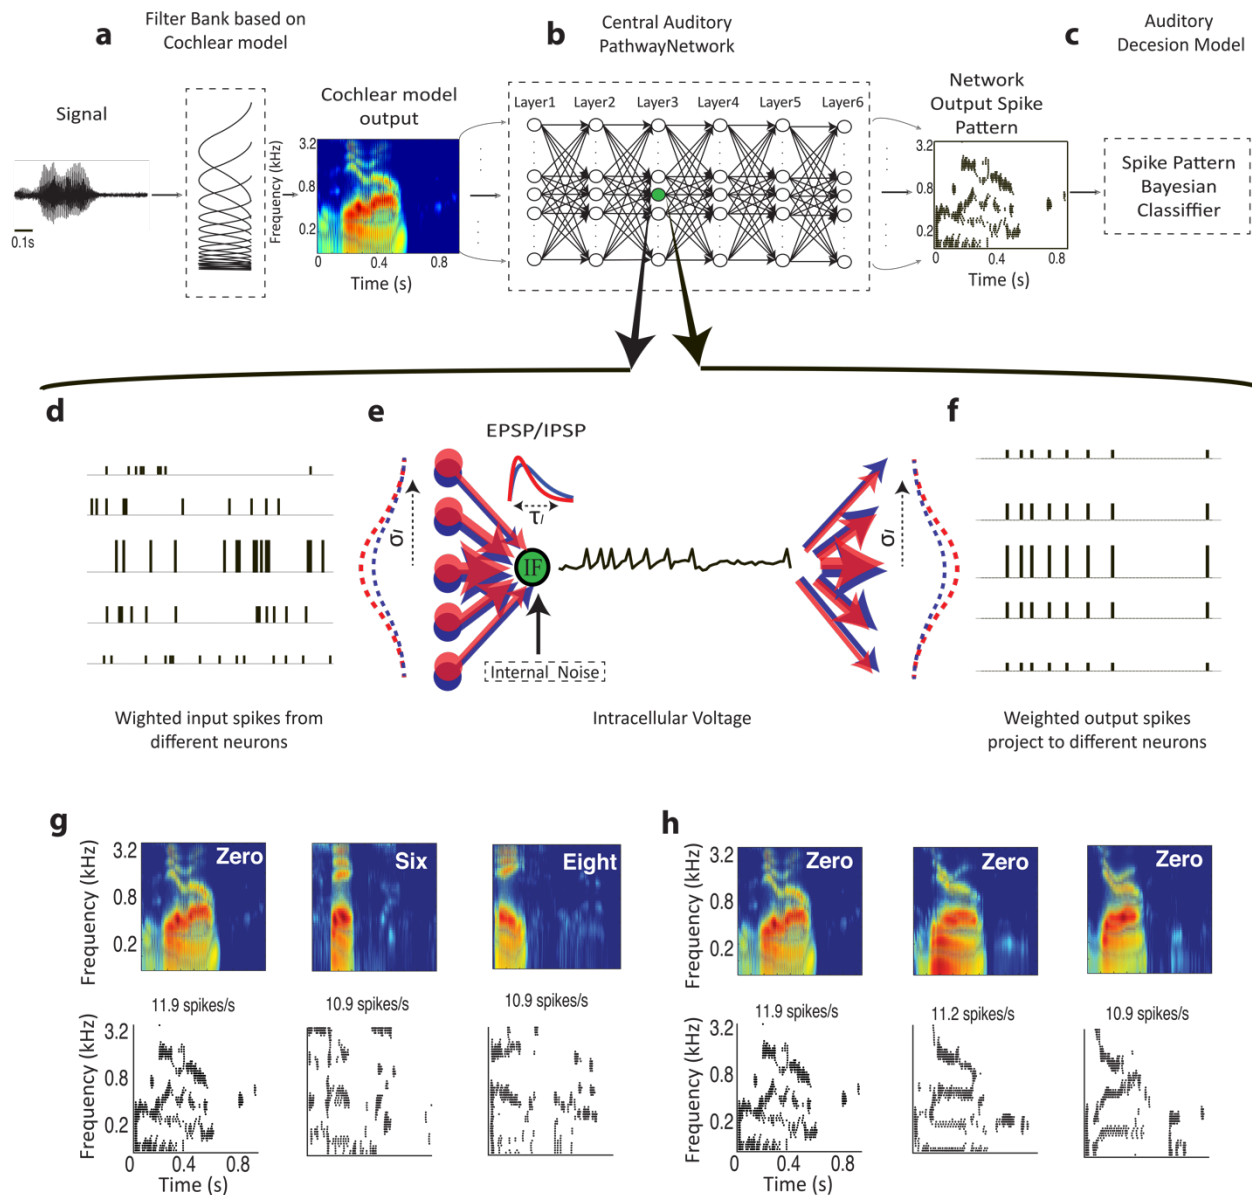

726

727 Figure 1. Auditory pathway *hierarchical spiking neural network* (HSNN) model. The model  
 728 consists of a **(a)** cochlear model stage that transforms the sound waveform into a spectrogram (time  
 729 vs. frequency), **(b)** a central hierarchical spiking neural network containing frequency organized  
 730 spiking neurons and a **(c)** Bayesian classifier that is used to read the spatio-temporal spike train  
 731 outputs of the HSNN. Each dot in the output represents a single spike at a particular time-frequency  
 732 bin. **(d-f)** Zoomed in view of the HSNN illustrates the pattern of convergent and divergent  
 733 connections between network layers for a single leaky integrate-and-fire (LIF) neuron. **(d-e)** Input  
 734 spike trains from the preceding network layer are integrated with excitatory (red) and inhibitory  
 735 (blue) connectivity weights that are spatially localized and model by Gaussian functions **(f)**. The  
 736 divergence and convergence between consecutive layers is controlled by the connectivity width  
 737 (SD of the Gaussian model,  $\sigma_l$ ). Each incoming spike generates excitatory and inhibitory post-  
 738 synaptic potentials (EPSP and IPSP, red and blue kernels in **e**). The integration time constant ( $\tau_l$ )

739 of the EPSP and IPSP kernels can be adjusted to control the temporal integration between  
740 consecutive network layers while the spike threshold level ( $N_l$ ) is independently adjusted to control  
741 the output firing rates and the overall neuron layer sensitivity. **(g, h)** Example cochlear model  
742 outputs and the corresponding multi-neuron spike train outputs of the HSNN under the influence  
743 of speech babble noise (at 20 dB SNR). **(g)** HSNN response pattern for one sample of the words  
744 *zero*, *six*, and *eight* illustrate output pattern variability that can be used to differentiate words. **(h)**  
745 Example response variability for the word *zero* from multiple talkers in the presence of speech  
746 babble noise (20 dB SNR).

747

Fig2, Khatami; Escabi

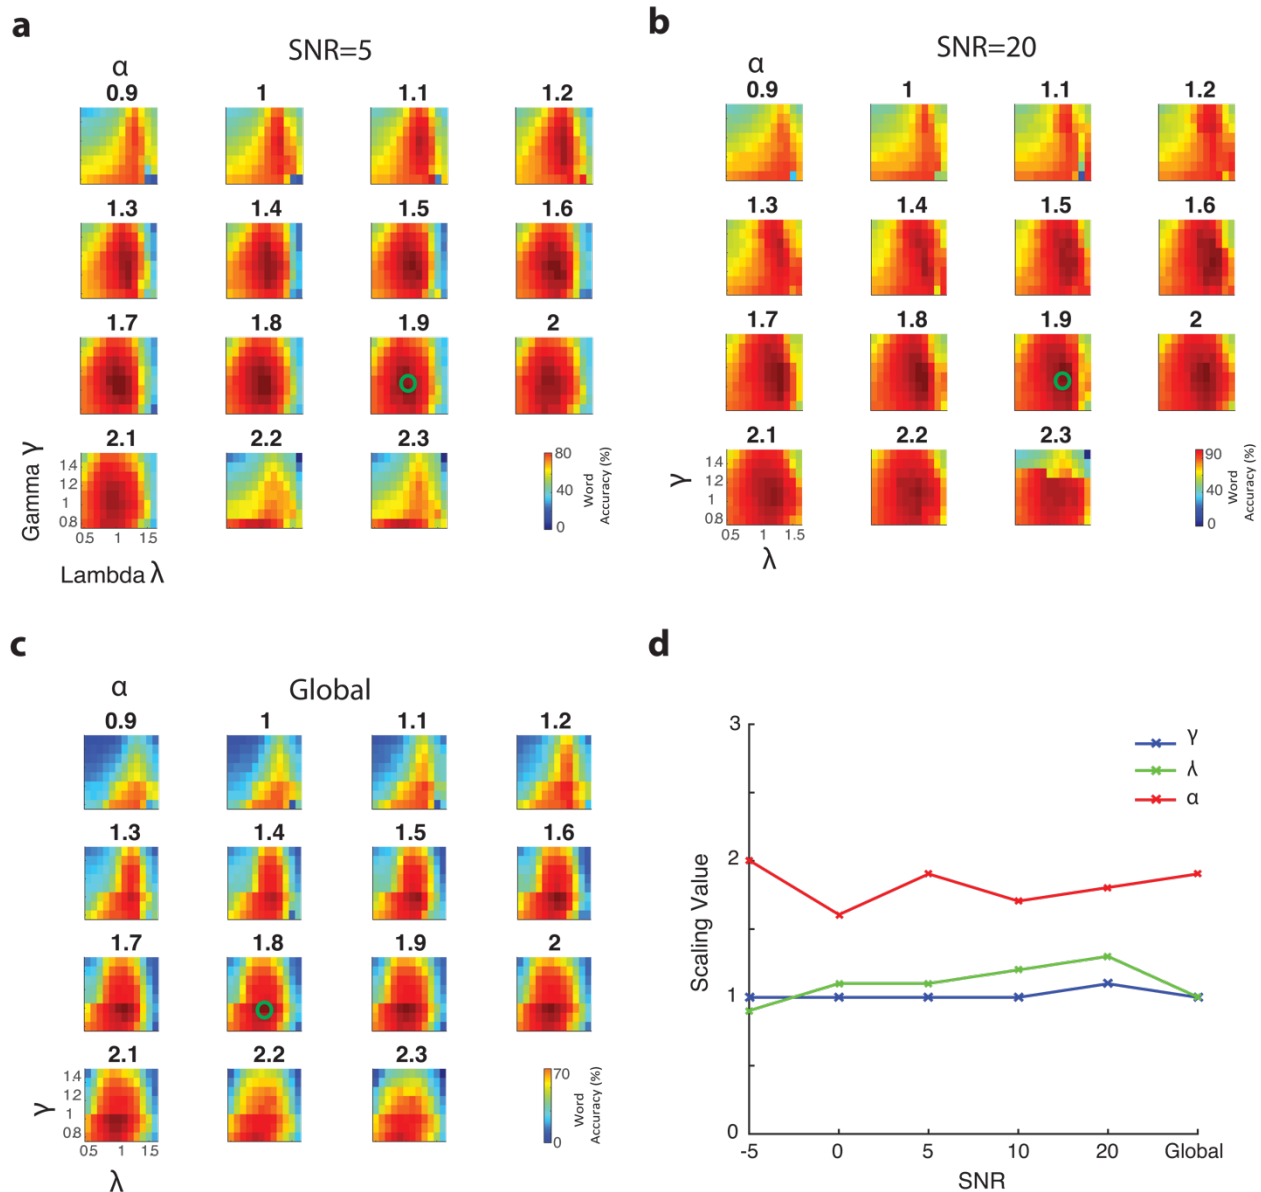

748

749

750

751

752

753

754

755

756

757

758

Figure 2. Hierarchical scaling is predicted by a global optimal solution that maximizes word recognition accuracy in the presence of background noise (-5, 0, 5, 10, 15 and 20 dB SNR). Cross-validated word recognition accuracy (see Methods) is measured using the network outputs as a function of the three scaling parameters ( $\alpha$ ,  $\lambda$ , and  $\gamma$ ). Word recognition accuracy curves are shown at 5 and 20 dB SNR (a and b, respectively) as well as for the global solution (c, average accuracy between -5 and 20 dB SNR). In all cases shown, word recognition accuracy curves are tuned for the different scaling parameters and exhibit a similar optimal solution (green circles). (d) The optimal scaling parameters are relatively stable across SNRs and similar to the solution that maximize average performance across all SNRs (optimal solution  $\alpha = 1.9$ ,  $\lambda = 1.0$ , and  $\gamma=1.0$ ).

Fig3, Khatami; Escabi

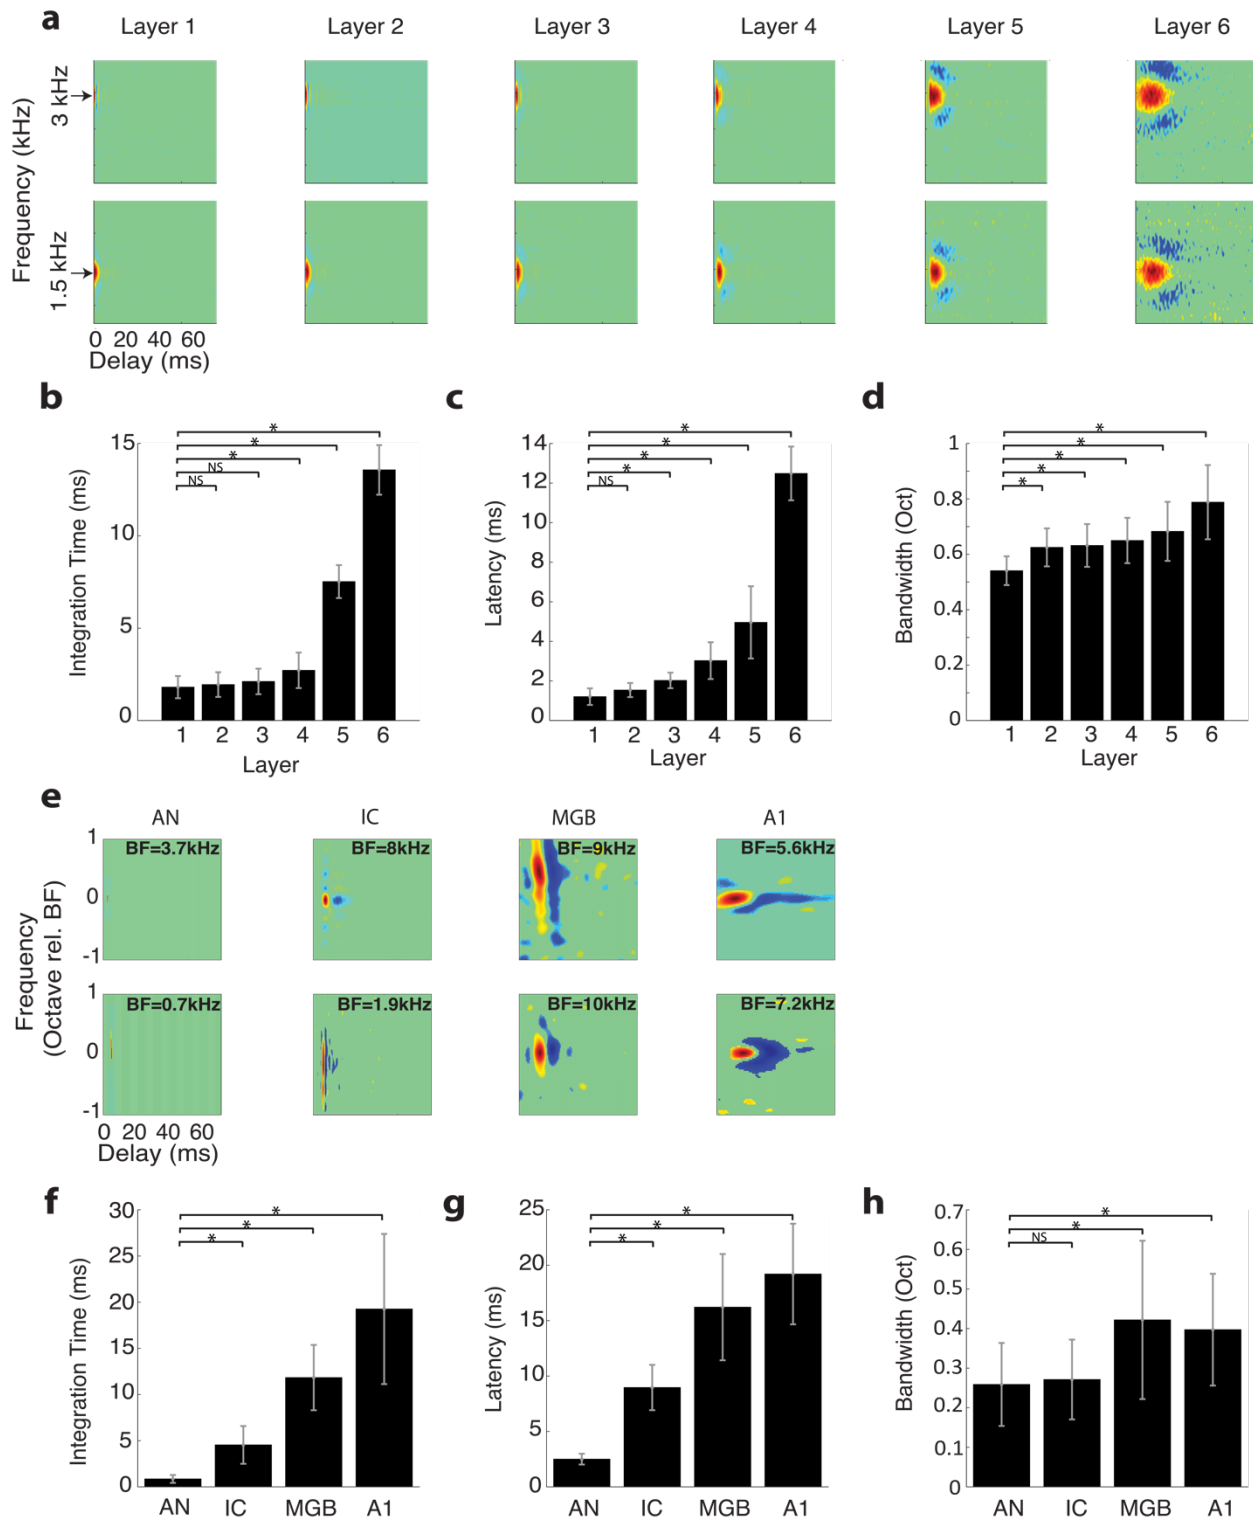

759  
 760  
 761  
 762

Figure 3. Receptive field transformations of the optimal HSNN predicts transformations observed along the ascending auditory pathway. (a) Example spectro-temporal receptive field (STRF) measured for the optimal network change systematically between consecutive network layers. All



763 STRFs are normalized to the same color scale (red=increase in activity or excitation;  
764 blue=decrease in activity or inhibition/suppression; green tones=lack of activity). In the early  
765 network layers STRFs are relatively fast with short duration and latencies, and relatively narrowly  
766 tuned. STRFs become progressively slower, slightly broader, and have longer and more varied  
767 patterns of inhibition across the network layers, mirroring changes in spectral and temporal  
768 selectivity observed in the ascending auditory pathway. The measured **(b)** integration times, **(c)**  
769 latencies, and **(d)** bandwidths increase across the six network layers. **(e)** Examples STRFs from  
770 the auditory nerve (AN)<sup>26</sup>, inferior colliculus (IC)<sup>5</sup>, thalamus (MGB) and primary auditory cortex  
771 (A1)<sup>6</sup> become progressively longer and have progressively more complex spectro-temporal  
772 sensitivity along the ascending auditory pathway. Average integration times **(f)**, latencies **(g)** and  
773 bandwidths **(h)** between AN and A1 follow similar trends as the optimal HSNN **(b-d)**. Asterisks  
774 (\*) designate significant comparisons (t-test with Bonferroni correction,  $p < 0.01$ ) relative to layer  
775 1 for the optimal network **(b-d)** or relative to the auditory nerve for the neural data **(f-h)** while  
776 error bars designate SD.  
777  
778

Fig4, Khatami; Escabi

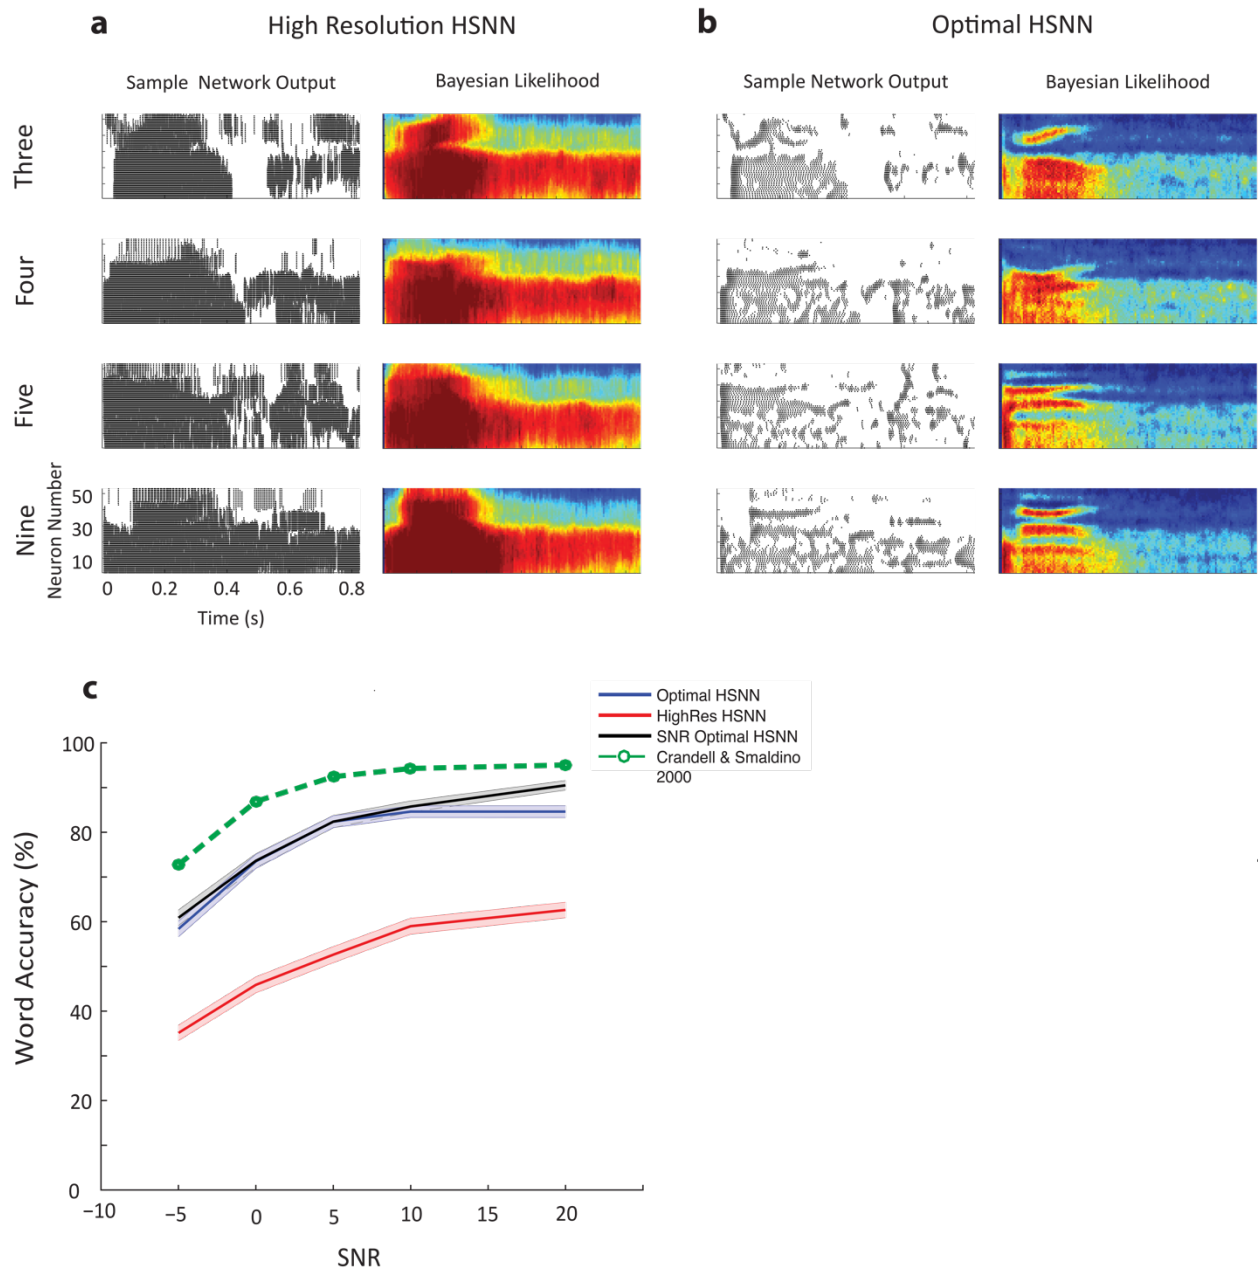

779  
780 Figure 4. Optimal HSNN outperforms a high-resolution HSNN designed to preserve incoming  
781 acoustic information. Sample network spike train outputs and Bayesian likelihood histograms for  
782 the words *three*, *four*, *five*, and *nine* are shown for the (a) high-resolution and (b) optimal HSNN  
783 at 5 dB SNR. The Bayesian likelihood histograms correspond to the average probability of firing  
784 at each time-frequency bin for each digit (averaged across all trials and talkers). The firing patterns  
785 and Bayesian likelihood of the high-resolution network are spatio-temporally blurred compared to  
786 the hierarchical network. (b) Details such as spectral resonances (e.g., formants) and temporal  
787 transitions resulting from voicing onset are accentuated in the hierarchical network output. (c) The  
788 optimal HSNN (maximize performance across all SNRs) outperforms the high-resolution network  
789 in the word recognition task at all SNRs tested (blue=optimal; red=high-resolution) with an

790 average accuracy improvement of 25.6 %. The optimal HSNN word recognition accuracy also  
791 closely matches the performance when the network is optimized and tested individually at each  
792 SNR (black, SNR optimal HSNN) indicative of a stable network representation. Finally, the  
793 optimal HSNN is within ~10% of human performance in a similar word recognition task (dotted-  
794 green curve<sup>32</sup>).  
795  
796

Fig5, Khatami; Escabi

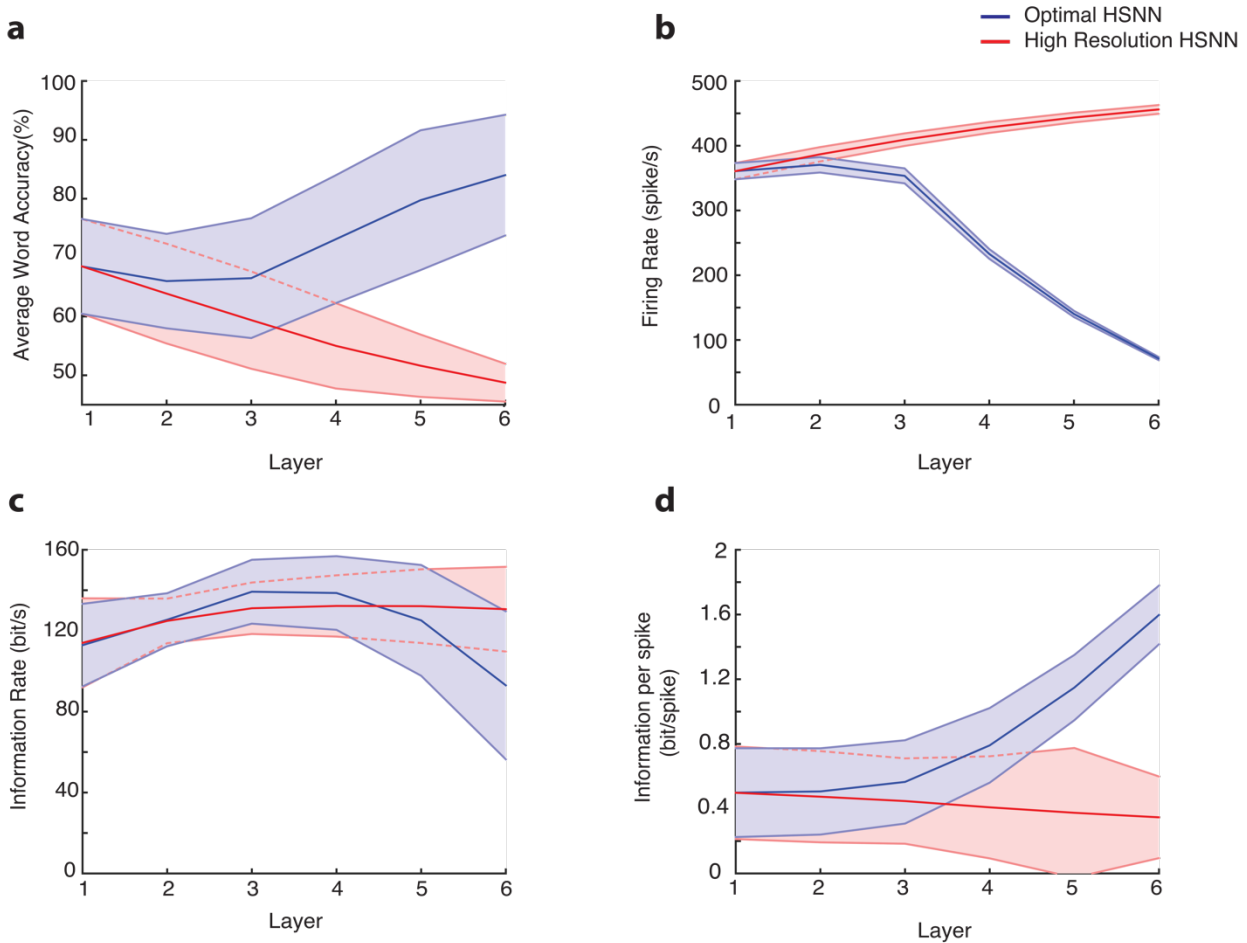

797

798 Figure 5. Hierarchical transformation between consecutive network layers enhances word  
799 recognition performance and robustness of the optimal HSNN. (a) The average word accuracy at

800 5 dB SNR systematically increases across network layers for the optimal HSNN (a, blue) whereas  
801 the high-resolution HSNN exhibits a systematic reduction in word recognition accuracy (a, red).

802 For the high-resolution HSNN average firing rates (b, red), information rates (c, red), and  
803 information per spike (d, red) are relatively constant across layers indicating minimal

804 transformations of the incoming acoustic information. In contrast, average firing rates (b, blue)  
805 and information rates (c, blue) both decrease between the first and last network layers of the

806 optimal network, consistent with a sequential sparsification of the response and a reduction in the  
807 acoustic information encoded in the output spike trains. However, the information conveyed by

808 single action potentials (d, blue) in the optimal HSNN sequentially increase between the first and  
809 last layer so that individual action potentials become progressively more informative across layers.

810 Continuous curves show the mean whereas error contours designate the SD.

811

812

Fig6, Khatami; Escabi

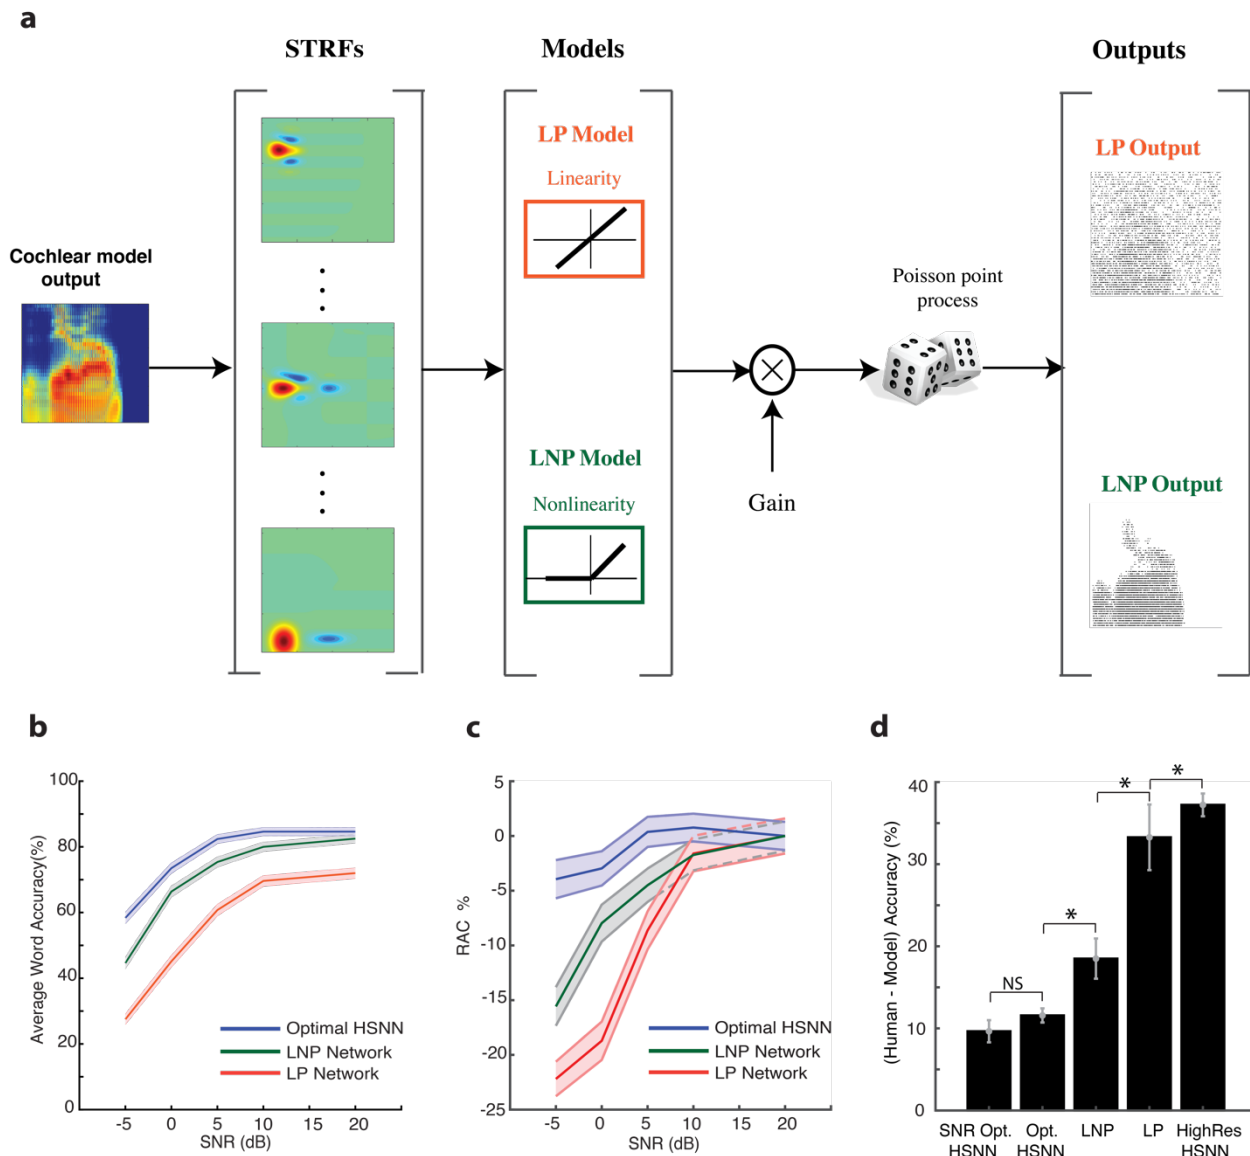

813

814

815 Figure 6. Optimal HSNN enhances robustness and outperforms single-layer generalized linear

816 model networks with matched linear and nonlinear receptive field transformation. (a) Linear

817 STRFs obtained at the output of the HSNN are used as to model the linear receptive field

818 transformation of each neuron (see Methods). The LP network consists of an array of linear STRFs

819 followed by a Poisson spike generator. The LNP network additionally incorporates a rectifying

820 output stage following each STRF. (b) The optimal HSNN outperformance the LP network with

821 an average performance improvement of 21.7% across SNRs. Nonlinear output rectification in the

822 LNP network improves the performance to within 2% of the HSNN at 20 dB SNR. However, the

823 average LNP performance was 7% lower than the optimal HSNN and performance degraded

824 systematically with increasing noise levels (13.75 % performance reduction at -5 dB SNR)

825 demonstrating enhanced robustness of the optimal HSNN. (c) The relative accuracy change

826 ( $RAC = (A_{\text{model}} - A_{\text{human}}) - (A_{\text{model}}^{20\text{dB}} - A_{\text{human}}^{20\text{dB}})$ ) was used to measure the divergence of each model

across SNR when compared against human accuracy rates<sup>32</sup>. An RAC of 0 across SNRs indicates

827 that the model performance follows a similar noise robust trend when compared to humans. For  
828 the optimal HSNN, RACs were near zero across SNRs. RACs diverged substantially relative to  
829 human accuracy rates with increasing SNR for the LP and LNP networks. **(d)** Average accuracy  
830 difference between human and model data ( $A_{\text{human}} - A_{\text{model}}$ ). Average performance of the SNR  
831 optimal (optimized for each SNR) and optimal HSNN (optimized across all SNRs) are within ~10  
832 % of the human word accuracy rates. The LNP (18.5 %), LP (33.3%) and high-resolution HSNN  
833 (37.2%) performance are substantially lower relative to humans. Asterisks designate significant  
834 differences ( $p < 0.05$ , t-test with Bonferroni correction) and error bars designate SEM.  
835  
836

Fig7, Khatami; Escabi

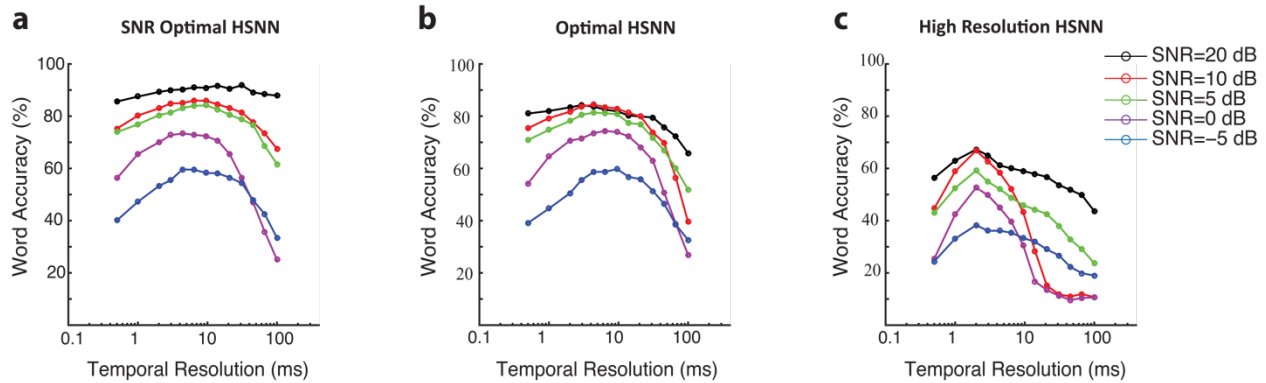

837  
838

839 Figure 7. Optimal temporal resolution that maximize word recognition accuracy in noise. (a) Word  
840 accuracy rate as a function of spike train temporal resolution (bin widths 0.5-100 mms) and SNR  
841 (-5 to 20 dB) for the optimal (a) and high resolution networks (c). Each curve is computed by  
842 selecting the optimal scaling parameters for each SNR and measuring the word accuracy rate from  
843 the network outputs at multiple temporal resolutions. (b) Same as (a), except that global optimal  
844 scaling parameters were used for all SNRs tested. The temporal resolution that maximizes the word  
845 accuracy rate of the global optimal HSNN is 6.5 ms. (c) Word accuracy rate as a function of  
846 temporal resolution and SNR for the high-resolution network. The optimal temporal resolution for  
847 the high-resolution HSNN is 2 ms.

848  
849

Fig1S, Khatami; Escabi

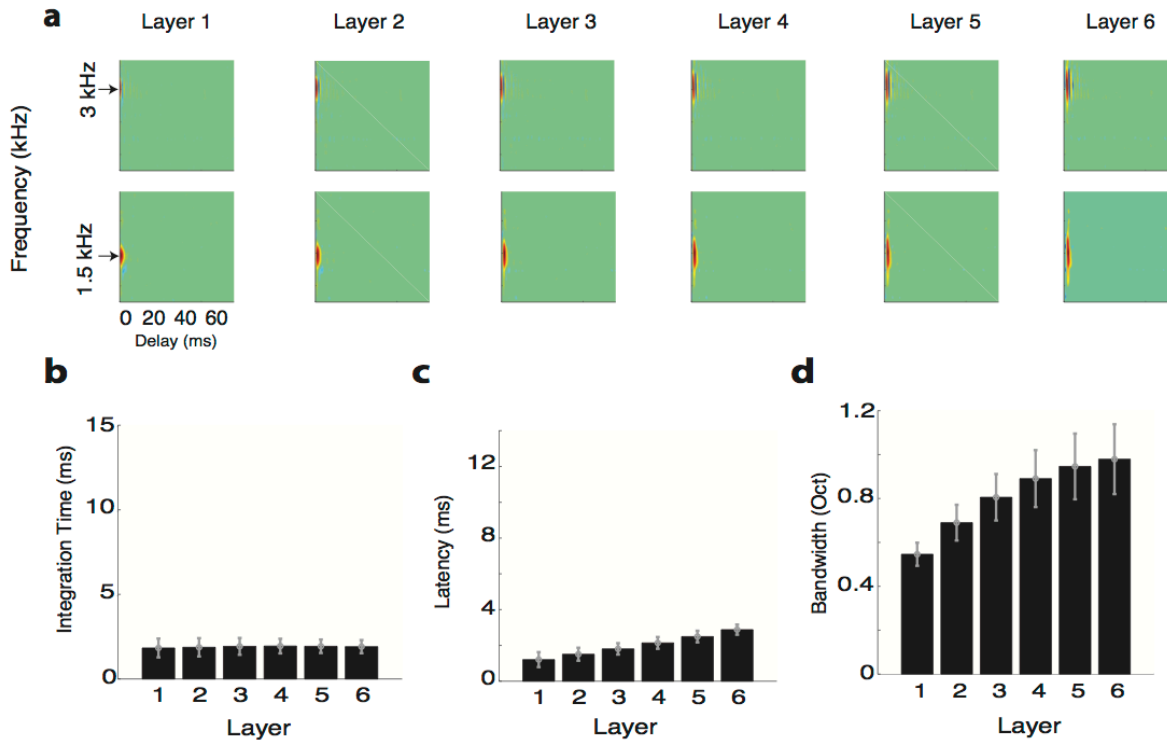

850  
851  
852  
853  
854  
855  
856  
857  
858  
859

Figure 1S. Receptive field transformations of the high-resolution network indicate that spectro-temporal information propagates with minimal processing across network layers. (a) Example spectro-temporal receptive field (STRF) measured for the optimal network maintain high-resolution and change minimally across network layers. Unlike the optimal network, the measured (b) integration times and (c) latencies change minimally and are relatively constant across the six network layers. (d) Bandwidths, by comparison, increase slightly across the six network layers and follow a similar trend as the optimal HSNN. The figure format follows the same convention as in Figure 3.
